# Supplementary material
Source: PubMed Central journal article supplement (PMC33449)
Supplement: pnas_111069498_6.pdf [file pnas_111069498_6.pdf]

Supplementary material for Wilf *et al.* (May 15, 2001) *Proc. Natl. Acad. Sci. USA*,  
10.1073/pnas.111069498

**Table 6.** Summary data for early Eocene insect damage, all specimens

| Host                       | #Lvs. | %Dam. | #DT | DT1 | DT2 | DT3 | DT4 | DT5 | DT6 | DT9 | DT11 | DT12 | DT13 | DT14 | DT15 | DT16 | DT17 | DT20 | DT29 | DT32 | DT33 | DT34 | DT41 | DT43 | DT44 | DT46 |
|----------------------------|-------|-------|-----|-----|-----|-----|-----|-----|-----|-----|------|------|------|------|------|------|------|------|------|------|------|------|------|------|------|------|
| All                        | 792   | 34.8  | 23  | 32  | 87  | 8   | 1   | 56  | 1   | 11  | 1    | 88   | 2    | 5    | 5    | 7    | 1    | 1    | 5    | 14   | 1    | 1    | 4    | 2    | 1    | 1    |
| <i>Allophylus</i>          | 24    | 45.8  | 4   | 1   | 8   | 0   | 0   | 2   | 0   | 0   | 0    | 1    | 0    | 0    | 0    | 0    | 0    | 0    | 0    | 0    | 0    | 0    | 0    | 0    | 0    | 0    |
| <i>Alnus</i>               | 286   | 45.8  | 19  | 18  | 24  | 3   | 0   | 28  | 1   | 6   | 1    | 49   | 1    | 3    | 3    | 5    | 1    | 1    | 3    | 10   | 1    | 0    | 4    | 1    | 0    | 0    |
| Apocynaceae sp.            | 223   | 17.5  | 9   | 5   | 13  | 2   | 0   | 0   | 0   | 2   | 0    | 12   | 1    | 0    | 1    | 0    | 0    | 0    | 0    | 3    | 0    | 1    | 0    | 0    | 0    | 0    |
| <i>Cinnamomophyllum</i>    | 20    | 65.0  | 6   | 4   | 5   | 0   | 0   | 2   | 0   | 0   | 0    | 5    | 0    | 0    | 0    | 0    | 0    | 0    | 1    | 0    | 0    | 0    | 0    | 0    | 1    | 0    |
| " <i>Dombeya</i> "         | 22    | 36.4  | 6   | 1   | 3   | 1   | 0   | 3   | 0   | 0   | 0    | 1    | 0    | 0    | 0    | 0    | 0    | 0    | 0    | 0    | 0    | 0    | 0    | 1    | 0    | 0    |
| aff. Fagaceae              | 1     | 0     | 0   | 0   | 0   | 0   | 0   | 0   | 0   | 0   | 0    | 0    | 0    | 0    | 0    | 0    | 0    | 0    | 0    | 0    | 0    | 0    | 0    | 0    | 0    | 0    |
| <i>Hovenia</i>             | 63    | 41.3  | 7   | 1   | 16  | 1   | 1   | 8   | 0   | 0   | 0    | 6    | 0    | 0    | 0    | 0    | 0    | 0    | 1    | 0    | 0    | 0    | 0    | 0    | 0    | 0    |
| Lauraceae sp. 2            | 3     | 0     | 0   | 0   | 0   | 0   | 0   | 0   | 0   | 0   | 0    | 0    | 0    | 0    | 0    | 0    | 0    | 0    | 0    | 0    | 0    | 0    | 0    | 0    | 0    | 0    |
| cf. Magnoliales            | 1     | 0     | 0   | 0   | 0   | 0   | 0   | 0   | 0   | 0   | 0    | 0    | 0    | 0    | 0    | 0    | 0    | 0    | 0    | 0    | 0    | 0    | 0    | 0    | 0    | 0    |
| <i>Platycarya</i>          | 9     | 55.6  | 3   | 0   | 3   | 0   | 0   | 0   | 0   | 0   | 0    | 2    | 0    | 1    | 0    | 0    | 0    | 0    | 0    | 0    | 0    | 0    | 0    | 0    | 0    | 0    |
| <i>Populus wyomingiana</i> | 37    | 35.1  | 8   | 1   | 5   | 0   | 0   | 2   | 0   | 0   | 0    | 4    | 0    | 1    | 1    | 1    | 0    | 0    | 1    | 0    | 0    | 0    | 0    | 0    | 0    | 0    |
| cf. <i>Schoepfia</i>       | 1     | 0     | 0   | 0   | 0   | 0   | 0   | 0   | 0   | 0   | 0    | 0    | 0    | 0    | 0    | 0    | 0    | 0    | 0    | 0    | 0    | 0    | 0    | 0    | 0    | 0    |
| <i>Sloanea</i>             | 58    | 24.1  | 5   | 1   | 5   | 0   | 0   | 6   | 0   | 0   | 0    | 5    | 0    | 0    | 0    | 1    | 0    | 0    | 0    | 0    | 0    | 0    | 0    | 0    | 0    | 0    |
| <i>Stillingia</i>          | 1     | 0     | 0   | 0   | 0   | 0   | 0   | 0   | 0   | 0   | 0    | 0    | 0    | 0    | 0    | 0    | 0    | 0    | 0    | 0    | 0    | 0    | 0    | 0    | 0    | 0    |
| <i>Syzygioides</i>         | 3     | 33.3  | 1   | 0   | 1   | 0   | 0   | 0   | 0   | 0   | 0    | 0    | 0    | 0    | 0    | 0    | 0    | 0    | 0    | 0    | 0    | 0    | 0    | 0    | 0    | 0    |
| "Dicot XXXVI"              | 6     | 50.0  | 3   | 0   | 0   | 1   | 0   | 1   | 0   | 0   | 0    | 0    | 0    | 0    | 0    | 0    | 0    | 0    | 0    | 0    | 0    | 0    | 0    | 0    | 0    | 1    |
| RR31                       | 2     | 50.0  | 1   | 0   | 0   | 0   | 0   | 1   | 0   | 0   | 0    | 0    | 0    | 0    | 0    | 0    | 0    | 0    | 0    | 0    | 0    | 0    | 0    | 0    | 0    | 0    |
| RR37                       | 14    | 14.3  | 2   | 0   | 1   | 0   | 0   | 1   | 0   | 0   | 0    | 0    | 0    | 0    | 0    | 0    | 0    | 0    | 0    | 0    | 0    | 0    | 0    | 0    | 0    | 0    |
| RR57                       | 12    | 58.3  | 4   | 0   | 1   | 0   | 0   | 2   | 0   | 3   | 0    | 3    | 0    | 0    | 0    | 0    | 0    | 0    | 0    | 0    | 0    | 0    | 0    | 0    | 0    | 0    |
| RR63                       | 1     | 0     | 0   | 0   | 0   | 0   | 0   | 0   | 0   | 0   | 0    | 0    | 0    | 0    | 0    | 0    | 0    | 0    | 0    | 0    | 0    | 0    | 0    | 0    | 0    | 0    |
| RR88                       | 3     | 33.3  | 1   | 0   | 1   | 0   | 0   | 0   | 0   | 0   | 0    | 0    | 0    | 0    | 0    | 0    | 0    | 0    | 0    | 0    | 0    | 0    | 0    | 0    | 0    | 0    |
| RR95                       | 2     | 50.0  | 1   | 0   | 1   | 0   | 0   | 0   | 0   | 0   | 0    | 0    | 0    | 0    | 0    | 0    | 0    | 0    | 0    | 0    | 0    | 0    | 0    | 0    | 0    | 0    |

Damage type (DT) numbers correspond to Table 4. #Lvs., number of leaves; %Dam., percent of leaves with insect damage; #DT, number of damage types. The damage type columns show the numbers of leaves bearing individual damage types. Individual leaves often bore more than one insect damage type, so that row totals do not correspond precisely to the percentages in the third column.
