# Supplementary material
Source: PubMed Central journal article supplement (PMC33449)
Supplement: pnas_111069498_7.pdf [file pnas_111069498_7.pdf]

**Table 7.** Summary data for middle Eocene insect damage, all specimens

| Host                  | #Lvs. | %Dam. | #DT | DT1 | DT2 | DT3 | DT5 | DT6 | DT8 | DT12 | DT13 | DT14 | DT15 | DT16 | DT17 | DT20 | DT22 | DT24 | DT26 | DT27 | DT29 | DT30 | DT31 | DT32 | DT33 | DT34 | DT36 | DT37 | DT41 |
|-----------------------|-------|-------|-----|-----|-----|-----|-----|-----|-----|------|------|------|------|------|------|------|------|------|------|------|------|------|------|------|------|------|------|------|------|
| All                   | 894   | 19.4  | 26  | 42  | 21  | 21  | 11  | 2   | 1   | 48   | 5    | 19   | 16   | 4    | 9    | 1    | 2    | 1    | 1    | 3    | 4    | 3    | 2    | 4    | 5    | 4    | 1    | 1    | 1    |
| "Acer"                | 1     | 0     | 0   | 0   | 0   | 0   | 0   | 0   | 0   | 0    | 0    | 0    | 0    | 0    | 0    | 0    | 0    | 0    | 0    | 0    | 0    | 0    | 0    | 0    | 0    | 0    | 0    | 0    | 0    |
| Aleurites             | 4     | 75.0  | 3   | 0   | 2   | 0   | 0   | 0   | 0   | 1    | 1    | 0    | 0    | 0    | 0    | 0    | 0    | 0    | 0    | 0    | 0    | 0    | 0    | 0    | 0    | 0    | 0    | 0    | 0    |
| Allophylus            | 44    | 43.2  | 9   | 2   | 0   | 3   | 2   | 0   | 0   | 9    | 0    | 5    | 3    | 0    | 0    | 0    | 1    | 0    | 0    | 0    | 1    | 0    | 0    | 0    | 1    | 0    | 0    | 0    | 0    |
| Araliophyllum         | 5     | 0     | 0   | 0   | 0   | 0   | 0   | 0   | 0   | 0    | 0    | 0    | 0    | 0    | 0    | 0    | 0    | 0    | 0    | 0    | 0    | 0    | 0    | 0    | 0    | 0    | 0    | 0    | 0    |
| "Caesalpinia"         | 39    | 12.8  | 6   | 2   | 2   | 2   | 1   | 0   | 0   | 1    | 0    | 0    | 0    | 0    | 0    | 0    | 0    | 0    | 0    | 0    | 0    | 0    | 0    | 0    | 0    | 0    | 0    | 1    | 0    |
| Cardiospermum         | 34    | 8.82  | 3   | 2   | 0   | 0   | 0   | 0   | 0   | 1    | 0    | 0    | 0    | 0    | 0    | 0    | 0    | 0    | 0    | 0    | 0    | 0    | 0    | 0    | 1    | 0    | 0    | 0    | 0    |
| Cedrelospermum        | 239   | 20.5  | 16  | 17  | 2   | 1   | 3   | 2   | 0   | 8    | 1    | 6    | 3    | 1    | 5    | 0    | 1    | 0    | 1    | 0    | 1    | 1    | 1    | 1    | 0    | 0    | 0    | 0    | 0    |
| Leguminosites         | 18    | 5.56  | 1   | 0   | 1   | 0   | 0   | 0   | 0   | 0    | 0    | 0    | 0    | 0    | 0    | 0    | 0    | 0    | 0    | 0    | 0    | 0    | 0    | 0    | 0    | 0    | 0    | 0    | 0    |
| Macginitiea           | 47    | 48.9  | 13  | 6   | 5   | 6   | 4   | 0   | 0   | 7    | 1    | 2    | 3    | 2    | 3    | 1    | 0    | 1    | 0    | 1    | 0    | 0    | 0    | 0    | 0    | 0    | 0    | 0    | 0    |
| Parvileguminophyllum  | 296   | 7.43  | 9   | 2   | 3   | 1   | 1   | 0   | 0   | 10   | 2    | 3    | 0    | 1    | 0    | 0    | 0    | 0    | 0    | 0    | 0    | 2    | 0    | 0    | 0    | 0    | 0    | 0    | 0    |
| Populus cinnamomoides | 23    | 26.1  | 5   | 2   | 1   | 3   | 0   | 0   | 0   | 0    | 0    | 0    | 0    | 0    | 0    | 0    | 0    | 0    | 0    | 1    | 0    | 0    | 1    | 0    | 0    | 0    | 0    | 0    | 0    |
| Populus wilmattae     | 26    | 61.5  | 11  | 4   | 1   | 2   | 0   | 0   | 0   | 6    | 0    | 0    | 1    | 0    | 0    | 0    | 0    | 0    | 0    | 0    | 1    | 0    | 0    | 3    | 1    | 3    | 1    | 0    | 1    |
| Rhus                  | 64    | 10.9  | 5   | 2   | 1   | 1   | 0   | 0   | 0   | 0    | 0    | 0    | 2    | 0    | 0    | 0    | 0    | 0    | 0    | 0    | 0    | 0    | 0    | 2    | 0    | 0    | 0    | 0    | 0    |
| Salix                 | 24    | 33.3  | 6   | 0   | 1   | 0   | 0   | 0   | 0   | 3    | 0    | 1    | 2    | 0    | 1    | 0    | 0    | 0    | 0    | 1    | 0    | 0    | 0    | 0    | 0    | 0    | 0    | 0    | 0    |
| Sterculia             | 1     | 0     | 0   | 0   | 0   | 0   | 0   | 0   | 0   | 0    | 0    | 0    | 0    | 0    | 0    | 0    | 0    | 0    | 0    | 0    | 0    | 0    | 0    | 0    | 0    | 0    | 0    | 0    | 0    |
| Styrax                | 7     | 14.3  | 1   | 0   | 0   | 0   | 0   | 0   | 0   | 0    | 0    | 0    | 1    | 0    | 0    | 0    | 0    | 0    | 0    | 0    | 0    | 0    | 0    | 0    | 0    | 0    | 0    | 0    | 0    |
| Syzygioides           | 9     | 66.7  | 6   | 2   | 2   | 2   | 0   | 0   | 0   | 1    | 0    | 1    | 1    | 0    | 0    | 0    | 0    | 0    | 0    | 0    | 0    | 0    | 0    | 0    | 0    | 0    | 0    | 0    | 0    |
| GR-A                  | 1     | 100   | 3   | 1   | 0   | 0   | 0   | 0   | 0   | 1    | 0    | 0    | 0    | 0    | 0    | 0    | 0    | 0    | 0    | 0    | 1    | 0    | 0    | 0    | 0    | 0    | 0    | 0    | 0    |
| GR-B                  | 1     | 0     | 0   | 0   | 0   | 0   | 0   | 0   | 0   | 0    | 0    | 0    | 0    | 0    | 0    | 0    | 0    | 0    | 0    | 0    | 0    | 0    | 0    | 0    | 0    | 0    | 0    | 0    | 0    |
| GR-C                  | 1     | 0     | 0   | 0   | 0   | 0   | 0   | 0   | 0   | 0    | 0    | 0    | 0    | 0    | 0    | 0    | 0    | 0    | 0    | 0    | 0    | 0    | 0    | 0    | 0    | 0    | 0    | 0    | 0    |
| GR-D                  | 2     | 0     | 0   | 0   | 0   | 0   | 0   | 0   | 0   | 0    | 0    | 0    | 0    | 0    | 0    | 0    | 0    | 0    | 0    | 0    | 0    | 0    | 0    | 0    | 0    | 0    | 0    | 0    | 0    |
| GR-D2                 | 1     | 100   | 1   | 0   | 0   | 0   | 0   | 0   | 0   | 0    | 0    | 0    | 0    | 0    | 0    | 0    | 0    | 0    | 0    | 0    | 0    | 0    | 0    | 1    | 0    | 0    | 0    | 0    | 0    |
| GR-G                  | 1     | 0     | 0   | 0   | 0   | 0   | 0   | 0   | 0   | 0    | 0    | 0    | 0    | 0    | 0    | 0    | 0    | 0    | 0    | 0    | 0    | 0    | 0    | 0    | 0    | 0    | 0    | 0    | 0    |
| GR-J                  | 1     | 0     | 0   | 0   | 0   | 0   | 0   | 0   | 0   | 0    | 0    | 0    | 0    | 0    | 0    | 0    | 0    | 0    | 0    | 0    | 0    | 0    | 0    | 0    | 0    | 0    | 0    | 0    | 0    |
| GR-M                  | 1     | 100   | 1   | 0   | 0   | 0   | 0   | 0   | 0   | 0    | 0    | 0    | 0    | 0    | 0    | 0    | 0    | 0    | 0    | 0    | 0    | 0    | 0    | 0    | 1    | 0    | 0    | 0    | 0    |
| GR-O                  | 1     | 0     | 0   | 0   | 0   | 0   | 0   | 0   | 0   | 0    | 0    | 0    | 0    | 0    | 0    | 0    | 0    | 0    | 0    | 0    | 0    | 0    | 0    | 0    | 0    | 0    | 0    | 0    | 0    |
| GR-S                  | 2     | 0     | 0   | 0   | 0   | 0   | 0   | 0   | 0   | 0    | 0    | 0    | 0    | 0    | 0    | 0    | 0    | 0    | 0    | 0    | 0    | 0    | 0    | 0    | 0    | 0    | 0    | 0    | 0    |
| GR-T                  | 1     | 100   | 2   | 0   | 0   | 0   | 0   | 0   | 0   | 0    | 1    | 1    | 0    | 0    | 0    | 0    | 0    | 0    | 0    | 0    | 0    | 0    | 0    | 0    | 0    | 0    | 0    | 0    | 0    |

Damage type (DT) numbers correspond to Table 4. #Lvs., number of leaves; %Dam., percent of leaves with insect damage; #DT, number of damage types. The damage type columns show the numbers of leaves bearing individual damage types. Individual leaves often bore more than one insect damage type, so that row totals do not correspond precisely to the percentages in the third column.
